# Supplementary material for: Association of Early Age at Establishment of Chronic Hepatitis B Infection with Persistent Viral Replication, Liver Cirrhosis and Hepatocellular Carcinoma: A Systematic Review
Source: PubMed Central journal article supplement (PMC3716646; doi:10.1371/journal.pone.0069430), 2013-07-19
Supplement: pone.0069430.s005.pdf [file pone.0069430.s005.pdf]

**Appendix S5-1. Description of Risk of Bias in Case-Control Studies, Cross-Sectional Studies and Case Series**

| First Author, Year, (Reference No.) | 1. Sample of Patients |                   |                                | 2. Outcome        |                            |                         | 3. Exposure       |                           |                         | 4. Analysis                      |                      |
|-------------------------------------|-----------------------|-------------------|--------------------------------|-------------------|----------------------------|-------------------------|-------------------|---------------------------|-------------------------|----------------------------------|----------------------|
|                                     | Eligibility Criteria  | Sample Selection  | Representativeness in Controls | Fully Defined     | Blinded to Exposure Status | Known for All Subjects? | Fully Defined     | Blinded to Outcome Status | Known for All Subjects? | Confounding Factors Adjusted for | Appropriate Analysis |
| Beasley, 1982 [22]                  | N/R                   | N/R               | N/R                            | N/R               | N/R                        | N/R                     | N/R               | N/R                       | N/R                     | none                             | good                 |
| Chang, 1989 [23]                    | good                  | poor <sup>b</sup> | poor <sup>d</sup>              | poor <sup>e</sup> | N/A                        | 100%                    | good              | N/R                       | 65%                     | matched on age                   | poor <sup>e</sup>    |
| Hsu, 1988 [24]                      | poor <sup>a</sup>     | poor <sup>c</sup> | N/A                            | good              | N/R                        | 100%                    | poor <sup>g</sup> | N/R                       | 67%                     | none                             | good                 |
| Wheeley, 1989 [29]                  | poor <sup>a</sup>     | poor <sup>c</sup> | N/A                            | good              | N/R                        | 100%                    | good              | N/A                       | 90%                     | none                             | poor <sup>m</sup>    |
| Habu, 1991                          | poor <sup>a</sup>     | poor <sup>c</sup> | N/A                            | good              | N/R                        | 100%                    | poor <sup>h</sup> | N/R                       | 100% <sup>k</sup>       | stratified by age group          | good                 |

---

|                       |      |                   |      |                   |      |      |                   |     |                                    |                                                                                                              |                      |
|-----------------------|------|-------------------|------|-------------------|------|------|-------------------|-----|------------------------------------|--------------------------------------------------------------------------------------------------------------|----------------------|
| [30]                  |      |                   |      |                   |      |      |                   |     |                                    |                                                                                                              |                      |
| Tai, 1999             | good | good              | N/A  | good              | N/R  | 90%  | poor <sup>i</sup> | N/R | 52%                                | none                                                                                                         | poor <sup>m</sup>    |
| [31]                  |      |                   |      |                   |      |      |                   |     |                                    |                                                                                                              |                      |
| Hopkirk, 2000 [32]    | N/R  | poor <sup>c</sup> | N/A  | poor <sup>h</sup> | N/R  | 89%  | poor <sup>g</sup> | N/R | 49%                                | adjusted for age                                                                                             | good                 |
| Soderstrom, 2002 [33] | good | poor <sup>c</sup> | N/A  | good              | N/R  | 100% | poor <sup>g</sup> | N/R | 75%                                | none                                                                                                         | good                 |
| Hsieh, 1992 [16]      | good | good              | good | good              | good | 100% | good              | N/R | 100%                               | adjusted for age, sex, smoking, anti-HCV, HBsAg and sibship size                                             | poor <sup>n</sup>    |
| Kuper, 2000 [35]      | good | poor <sup>b</sup> | good | poor <sup>e</sup> | N/A  | 100% | good              | N/R | 99% for cases and 97% for controls | matched on age and sex, adjusted for age, sex, schooling, smoking, alcohol, anti-HCV, HBsAg and sibship size | poor <sup>l, n</sup> |

---

---

|                    |      |                   |     |                   |     |      |                   |     |      |                                               |                   |
|--------------------|------|-------------------|-----|-------------------|-----|------|-------------------|-----|------|-----------------------------------------------|-------------------|
| Tai, 2002<br>[34]  | good | good              | N/A | good              | N/R | 95%  | good              | N/R | 100% | stratified by relationship<br>with index case | good              |
| Cai, 2003<br>[36]  | good | poor <sup>c</sup> | N/A | good              | N/R | 100% | poor <sup>j</sup> | N/A | 100% | none                                          | poor <sup>o</sup> |
| Cao, 2005<br>[37]  | good | poor <sup>c</sup> | N/A | poor <sup>f</sup> | N/R | 100% | poor <sup>j</sup> | N/A | 100% | none                                          | poor <sup>o</sup> |
| Song, 2009<br>[38] | good | good              | N/A | good              | N/R | 96%  | poor <sup>j</sup> | N/A | 100% | none                                          | poor <sup>o</sup> |

---

Abbreviations: HBsAg, hepatitis B surface antigen; HCV, hepatitis C virus; N/A, not applicable; N/R, not reported.

<sup>a</sup> Definition of HBsAg carrier was not presented.

<sup>b</sup> The way of selecting control subjects was unclear.

<sup>c</sup> Setting of sample selection was unclear.

<sup>d</sup> Hospital-based cases were compared with population-based controls.

<sup>e</sup> Cut-off value of alpha fetoprotein (AFP) for hepatocellular carcinoma (HCC) diagnosis was not presented.

<sup>f</sup> Diagnostic criteria for HCC were not presented.

<sup>g</sup> When maternal sero-status was examined was unclear.

<sup>h</sup> Method of testing hepatitis B virus (HBV) marker was not presented.

<sup>i</sup> When maternal sero-status was examined was not presented in the original paper, however this was described in a subsequent paper of the same study [34].

<sup>j</sup> Birth order was not defined.

<sup>k</sup> Maternal sero-status was known in all the participants because having a mother alive was one of the eligibility criteria.

<sup>l</sup> Matched design, but no matched analysis.

<sup>m</sup> Clustering effect of being born to the same mother was not taken account.

<sup>n</sup> Two different control groups were combined.

<sup>o</sup> Both the Greenwood-Yule and Haldane-Smith method are prone to bias due to change in population dynamics.

## Appendix S5-2. Description of Risk of Bias in Cohort Studies

| First Author, Year, (Reference No.) | 1. Sample of Patients |                   | 2. Follow up                |                   | 3. Outcome        |                            | 4. Exposure             |                   |                            | 5. Analysis             |                                  | 6.                   |                     |
|-------------------------------------|-----------------------|-------------------|-----------------------------|-------------------|-------------------|----------------------------|-------------------------|-------------------|----------------------------|-------------------------|----------------------------------|----------------------|---------------------|
|                                     | Eligibility Criteria  | Sample Selection  | Assembled at a Common Stage | Sufficiently Long | Fully Defined     | Blinded to Exposure Status | Known for all Subjects? | Fully Defined     | Blinded to Outcome Status? | Known for all Patients? | Confounding Factors Adjusted for | Appropriate Analysis | Fully Described     |
| McMahon, 2001 [21]                  | good                  | poor <sup>b</sup> | Good                        | good              | good              | N/R                        | 100%                    | poor <sup>e</sup> | N/A                        | 100%                    | N/R                              | poor <sup>i</sup>    | poor <sup>j</sup>   |
| Kojima, 1985 [25]                   | poor <sup>a</sup>     | poor <sup>b</sup> | Good                        | good              | poor <sup>c</sup> | N/R                        | 100%                    | poor <sup>f</sup> | N/R                        | 100% <sup>h</sup>       | N/R                              | poor <sup>i</sup>    | good (no treatment) |

---

|                      |                   |                   |      |      |                   |     |      |                   |     |     |                                                                     |                   |                        |
|----------------------|-------------------|-------------------|------|------|-------------------|-----|------|-------------------|-----|-----|---------------------------------------------------------------------|-------------------|------------------------|
| Kojima,<br>1985 [26] | poor <sup>a</sup> | poor <sup>b</sup> | Good | good | poor <sup>d</sup> | N/R | 100% | poor <sup>f</sup> | N/R | 72% | N/R                                                                 | poor <sup>i</sup> | good<br>(steroid)      |
| Chang,<br>1989 [27]  | good              | poor <sup>b</sup> | Good | good | good              | N/R | 100% | poor <sup>g</sup> | N/R | 95% | Stratified<br>by age<br>group                                       | poor <sup>i</sup> | good (no<br>treatment) |
| Tseng,<br>2011 [28]  | good              | poor <sup>b</sup> | Good | good | good              | N/R | 100% | good              | N/R | 95% | adjusted<br>for HBV<br>genotype<br>and<br>maternal<br>HBV<br>marker | good              | good (no<br>treatment) |

---

Abbreviations: HBV, hepatitis B virus; N/A, not applicable; N/R, not reported.

<sup>a</sup> Definition of hepatitis B surface antigen (HBsAg) carrier was not presented.

<sup>b</sup> Setting of sample selection was unclear.

<sup>c</sup> Method of measuring serum alanine transaminase (ALT) was not presented.

<sup>d</sup> Method of testing HBV marker was not presented.

<sup>e</sup> How often blood sample was obtained to determine timing of HBV infection was not reported.

<sup>f</sup> When maternal sero-status was examined was not presented in this paper, but this was confirmed by the communication with the author.

<sup>g</sup> When maternal sero-status was examined was unclear.

<sup>h</sup> Maternal sero-status was known in all the participants because having a mother tested was one of the eligibility criteria.

<sup>i</sup> Person-years at risk were not taken account in the analysis.

<sup>j</sup> For the sub-study of patients with known age at HBV infection, number of those who were treated was not reported.
